# Supplementary material for: Synthesis, crystal structure, mass spectrometry, electrochemistry and magnetism of a MnIII-substituted trilacunary Keggin tungstosilicate
Source: Royal Society of Chemistry journal article supplement (doi:10.1039/c3dt12500a), 2013-01-01
Supplement: c3dt12500a.pdf [file c3dt12500a.pdf]

## Supporting Information

### Synthesis, crystal structure, electrochemistry and magnetism of a $\text{Mn}^{\text{III}}$ -substituted trilacunary Keggin tungstosilicate

Denys Shevchenko<sup>a</sup>, Ping Huang<sup>a</sup>, Volodymyr V. Bon<sup>b</sup>, Magnus F. Anderlund<sup>a</sup>, Vladimir N. Kokozay<sup>c</sup>, Stenbjörn Styring<sup>a</sup>, Anders Thapper<sup>a</sup>

#### Crystal structure:

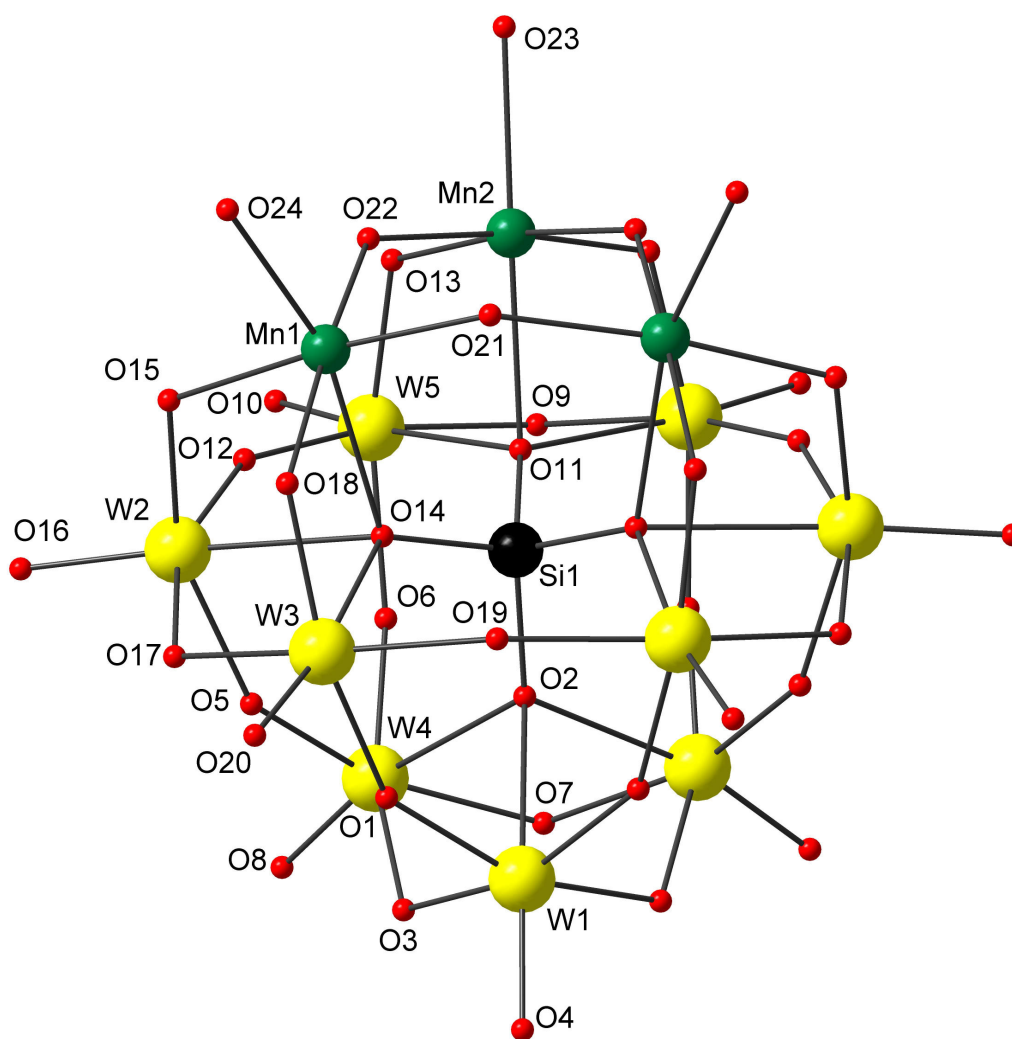

Figure S1. The labeling scheme of the POM anion in **1**.

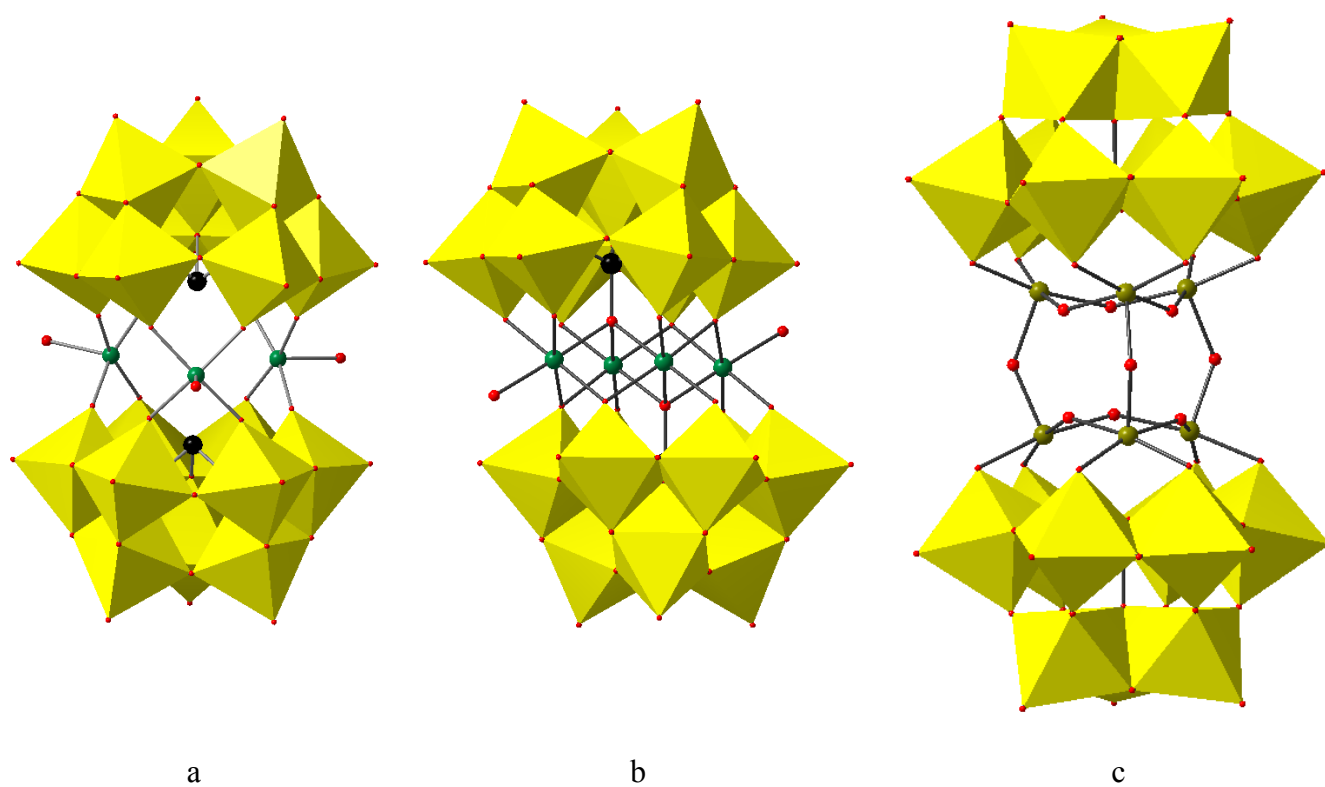

Figure S2. Most common structures of TMSPs based on trilacunary Keggin anions:

a)  $[(M(H_2O))_3(XW_9O_{33})_2]^{n-}$  ; b)  $[M_4(H_2O)_2(XW_9O_{34})_2]^{m-}$  ; c)  $[(M_3(OH)_3XW_9O_{34})_2(OH)_3]^{p-}$

*Coordination geometries of potassium atoms.*

Three different coordination environments around potassium ions can be distinguished in the crystal structure of **1**. The coordination sphere of the K1 cation (Fig. S3a) is occupied by one water molecule coordinated to a manganese ion, two crystal lattice water molecules, and three terminal oxygen atoms of three different POM anions forming a distorted pentagonal pyramid with one of POM oxygen atom in the top. The K1–O distances range from 2.764(7) to 3.106(8) Å. The K2 atom (Fig. S3b) is situated between eight corners sharing oxygen atoms of two manganese tungstosilicate anions and has a slightly distorted tetragonal prismatic geometry with K2–O distances ranging from 2.819(6) to 2.986(7) Å. The K3 cation (Fig. S3c) is seven-coordinated, being surrounded in an irregular way by three terminal oxygen atoms of three different POM anions, a terminal water molecule, the bridging oxo-groups of a fourth POM anion, and two lattice water molecules, which are bridging two K3 cations. The K3–O distances fall into the range of 2.66(2)–2.94(1) Å. Totally 14 K<sup>+</sup> ions (4 of the K1 type, 2 of the K2 type and 8 of the K3 type; Fig. S3d) surround each [Mn<sub>3</sub>(OH)<sub>3</sub>(H<sub>2</sub>O)<sub>3</sub>SiW<sub>9</sub>O<sub>34</sub>]<sup>5-</sup> anion forming a complex 3D network.



Table S1. Selected bond lengths

|                      |           |                       |           |
|----------------------|-----------|-----------------------|-----------|
| Mn1—O21              | 1.915(4)  | W4—O3                 | 1.946(7)  |
| Mn1—O22              | 1.931(8)  | W4—O2                 | 2.313(6)  |
| Mn1—O15              | 1.938(7)  | W5—O10                | 1.714(9)  |
| Mn1—O18              | 1.941(7)  | W5—O13                | 1.851(7)  |
| Mn1—O24              | 2.142(8)  | W5—O12                | 1.913(7)  |
| Mn1—O14              | 2.279(7)  | W5—O9                 | 1.936(5)  |
| Mn2—O13 <sup>i</sup> | 1.911(7)  | W5—O6                 | 1.982(7)  |
| Mn2—O13              | 1.911(7)  | W5—O11                | 2.314(7)  |
| Mn2—O22              | 1.959(8)  | W5—Mn2                | 3.213(2)  |
| Mn2—O22 <sup>i</sup> | 1.959(8)  | K1—O16 <sup>ii</sup>  | 2.763(7)  |
| Mn2—O23              | 2.133(11) | K1—O23                | 2.802(13) |
| Mn2—O11              | 2.266(10) | K1—O4 <sup>iv</sup>   | 2.849(10) |
| W1—O4                | 1.703(10) | K1—O25                | 2.932(12) |
| W1—O1                | 1.872(7)  | K1—O22                | 3.107(8)  |
| W1—O3                | 1.957(7)  | K1—O21                | 3.363(12) |
| W1—O2                | 2.326(9)  | K2—O17                | 2.818(8)  |
| W2—O16               | 1.707(7)  | K2—O5                 | 2.879(7)  |
| W2—O15               | 1.858(7)  | K2—O1                 | 2.962(7)  |
| W2—O17               | 1.922(7)  | K2—O3                 | 2.987(7)  |
| W2—O12               | 1.922(7)  | K3—O26                | 2.658(13) |
| W2—O5                | 1.987(7)  | K3—O8 <sup>vi</sup>   | 2.827(8)  |
| W2—O14               | 2.300(7)  | K3—O10 <sup>ii</sup>  | 2.841(7)  |
| W3—O20               | 1.710(7)  | K3—O20 <sup>vii</sup> | 2.842(10) |
| W3—O18               | 1.827(7)  | K3—O18                | 2.845(8)  |
| W3—O19               | 1.899(2)  | K3—O24                | 2.891(8)  |
| W3—O17               | 1.964(7)  | K3—O26 <sup>vii</sup> | 2.935(18) |
| W3—O1                | 1.976(7)  | Si1—O14               | 1.615(7)  |
| W3—O14               | 2.347(7)  | Si1—O11               | 1.618(10) |
| W4—O8                | 1.716(7)  | Si1—O2                | 1.638(9)  |
| W4—O6                | 1.877(7)  | Mn1—Mn2 <sup>i</sup>  | 3.583(3)  |
| W4—O5                | 1.881(7)  | Mn2—Mn1               | 3.583(3)  |
| W4—O7                | 1.942(5)  | Mn1—Mn1 <sup>i</sup>  | 3.537(2)  |

Table S2. Selected angles

|                        |           |                                          |            |
|------------------------|-----------|------------------------------------------|------------|
| O1—W1—O2               | 85.82(21) | O16 <sup>ii</sup> —K1—O16 <sup>iii</sup> | 147.18(18) |
| O1—W1—O1 <sup>i</sup>  | 88.7(4)   | O16 <sup>ii</sup> —K1—O23                | 76.24(17)  |
| O1—W1—O3 <sup>i</sup>  | 157.9(3)  | O16 <sup>ii</sup> —K1—O4 <sup>iv</sup>   | 77.39(16)  |
| O1—W1—O3               | 88.4(3)   | O23—K1—O4 <sup>iv</sup>                  | 72.02(31)  |
| O1 <sup>i</sup> —W1—O3 | 157.9(3)  | O16 <sup>ii</sup> —K1—O25                | 72.30(31)  |
| O3—W1—O2               | 72.21(20) | O16 <sup>iii</sup> —K1—O25               | 135.79(31) |
| O3 <sup>i</sup> —W1—O3 | 86.2(4)   | O23—K1—O25                               | 147.78(27) |
| O4—W1—O2               | 168.0(4)  | O4 <sup>iv</sup> —K1—O25                 | 107.04(27) |
| O4—W1—O3               | 99.3(3)   | O25 <sup>i</sup> —K1—O25                 | 64.30(38)  |
| O4—W1—O1               | 102.7(3)  | O23—K1—O22 <sup>i</sup>                  | 59.11(15)  |
| O15—W2—O17             | 91.5(3)   | O4 <sup>iv</sup> —K1—O22 <sup>i</sup>    | 122.54(13) |
| O16—W2—O17             | 97.8(3)   | O25 <sup>i</sup> —K1—O22 <sup>i</sup>    | 99.88(31)  |
| O16—W2—O15             | 101.3(3)  | O25—K1—O22 <sup>i</sup>                  | 130.39(31) |
| O16—W2—O12             | 100.7(3)  | O16 <sup>ii</sup> —K1—O22                | 63.89(21)  |
| O15—W2—O12             | 93.2(3)   | O16 <sup>iii</sup> —K1—O22               | 114.76(20) |
| O17—W2—O12             | 159.6(39) | O23—K1—O22                               | 59.11(15)  |
| O16—W2—O5              | 98.8(3)   | O4 <sup>iv</sup> —K1—O22                 | 122.54(13) |
| O15—W2—O5              | 159.9(3)  | O25 <sup>i</sup> —K1—O22                 | 130.39(31) |
| O17—W2—O5              | 85.4(3)   | O25—K1—O22                               | 99.88(31)  |
| O12—W2—O5              | 83.5(3)   | O22 <sup>i</sup> —K1—O22                 | 53.18(20)  |
| O16—W2—O14             | 172.5(3)  | O16 <sup>ii</sup> —K1—O21                | 100.74(16) |
| O15—W2—O14             | 77.5(3)   | O23—K1—O21                               | 98.64(31)  |
| O17—W2—O14             | 74.9(3)   | O4 <sup>iv</sup> —K1—O21                 | 170.65(29) |
| O12—W2—O14             | 86.7(3)   | O25—K1—O21                               | 80.78(27)  |
| O5—W2—O14              | 82.5(3)   | O22 <sup>i</sup> —K1—O21                 | 49.70(13)  |
| O16—W2—Mn1             | 133.7(3)  | O22—K1—O21                               | 49.70(13)  |
| O15—W2—Mn1             | 32.6(3)   | O17—K2—O5 <sup>v</sup>                   | 124.57(20) |
| O17—W2—Mn1             | 83.5(22)  | O17—K2—O5                                | 55.43(20)  |
| O12—W2—Mn1             | 89.8(2)   | O5 <sup>v</sup> —K2—O5                   | 179.99(19) |
| O5—W2—Mn1              | 127.3(2)  | O17—K2—O1 <sup>v</sup>                   | 125.57(20) |
| O14—W2—Mn1             | 44.97(16) | O5—K2—O1 <sup>v</sup>                    | 115.21(18) |
| O20—W3—O18             | 102.7(3)  | O17—K2—O1                                | 54.43(20)  |
| O20—W3—O19             | 102.2(4)  | O5 <sup>v</sup> —K2—O1                   | 115.21(18) |

|            |          |                                           |            |
|------------|----------|-------------------------------------------|------------|
| O18—W3—O19 | 93.3(4)  | O5—K2—O1                                  | 64.79(18)  |
| O20—W3—O17 | 98.1(3)  | O1 <sup>v</sup> —K2—O1                    | 180.00(19) |
| O18—W3—O17 | 91.1(3)  | O17—K2—O3 <sup>v</sup>                    | 87.46(20)  |
| O19—W3—O17 | 157.7(4) | O5—K2—O3 <sup>v</sup>                     | 126.07(18) |
| O20—W3—O1  | 99.8(3)  | O1—K2—O3 <sup>v</sup>                     | 126.62(17) |
| O18—W3—O1  | 157.5(3) | O17—K2—O3                                 | 92.54(20)  |
| O19—W3—O1  | 83.2(4)  | O5—K2—O3                                  | 53.93(18)  |
| O17—W3—O1  | 84.4(3)  | O1—K2—O3                                  | 53.38(17)  |
| O20—W3—O14 | 171.1(3) | O3 <sup>v</sup> —K2—O3                    | 179.99(18) |
| O18—W3—O14 | 76.3(3)  | O26—K3—O8 <sup>vi</sup>                   | 91.70(37)  |
| O19—W3—O14 | 86.7(4)  | O26—K3—O10 <sup>ii</sup>                  | 159.00(38) |
| O17—W3—O14 | 73.1(3)  | O8 <sup>vi</sup> —K3—O10 <sup>ii</sup>    | 68.02(24)  |
| O1—W3—O14  | 81.3(3)  | O26—K3—O20 <sup>vii</sup>                 | 86.66(37)  |
| O8—W4—O6   | 102.0(3) | O8 <sup>vi</sup> —K3—O20 <sup>vii</sup>   | 74.64(23)  |
| O8—W4—O5   | 102.2(3) | O10 <sup>ii</sup> —K3—O20 <sup>vii</sup>  | 82.77(23)  |
| O6—W4—O5   | 88.1(3)  | O26—K3—O18                                | 71.57(37)  |
| O8—W4—O7   | 98.7(4)  | O8 <sup>vi</sup> —K3—O18                  | 124.40(27) |
| O6—W4—O7   | 89.3(4)  | O10 <sup>ii</sup> —K3—O18                 | 123.91(26) |
| O5—W4—O7   | 159.0(3) | O20 <sup>vii</sup> —K3—O18                | 150.40(25) |
| O8—W4—O3   | 98.5(3)  | O26—K3—O24                                | 119.60(37) |
| O6—W4—O3   | 159.5(3) | O8 <sup>vi</sup> —K3—O24                  | 86.78(25)  |
| O5—W4—O3   | 88.1(3)  | O10 <sup>ii</sup> —K3—O24                 | 66.65(21)  |
| O7—W4—O3   | 87.1(4)  | O20 <sup>vii</sup> —K3—O24                | 148.57(24) |
| O8—W4—O2   | 168.3(3) | O18—K3—O24                                | 60.75(23)  |
| O6—W4—O2   | 86.9(3)  | O26—K3—O26 <sup>vii</sup>                 | 82.69(45)  |
| O5—W4—O2   | 85.4(3)  | O8 <sup>vi</sup> —K3—O26 <sup>vii</sup>   | 136.39(36) |
| O7—W4—O2   | 73.6(3)  | O10 <sup>ii</sup> —K3—O26 <sup>vii</sup>  | 107.84(35) |
| O3—W4—O2   | 72.7(3)  | O20 <sup>vii</sup> —K3—O26 <sup>vii</sup> | 61.91(33)  |
| O10—W5—O13 | 100.4(3) | O18—K3—O26 <sup>vii</sup>                 | 94.78(34)  |
| O10—W5—O12 | 101.0(3) | O24—K3—O26 <sup>vii</sup>                 | 133.21(35) |
| O13—W5—O12 | 90.7(3)  | O14—Si1—O14 <sup>i</sup>                  | 109.82(32) |
| O10—W5—O9  | 98.4(4)  | O14—Si1—O11                               | 110.80(24) |
| O13—W5—O9  | 91.7(4)  | O14—Si1—O2                                | 108.78(27) |
| O12—W5—O9  | 159.7(4) | O11—Si1—O2                                | 107.79(52) |

|             |            |                          |            |
|-------------|------------|--------------------------|------------|
| O10—W5—O6   | 100.5(3)   | W1—O1—W3                 | 149.77(43) |
| O13—W5—O6   | 159.0(3)   | W1—O1—K2                 | 106.09(25) |
| O12—W5—O6   | 84.3(3)    | W3—O1—K2                 | 102.63(29) |
| O9—W5—O6    | 86.3(4)    | Si1—O2—W4                | 122.80(1)  |
| O10—W5—O11  | 172.7(3)   | W4 <sup>I</sup> —O2—W4   | 93.10(1)   |
| O13—W5—O11  | 76.7(3)    | Si1—O2—W1                | 122.04(50) |
| O12—W5—O11  | 85.8(3)    | W4—O2—W1                 | 94.11(1)   |
| O9—W5—O11   | 75.1(3)    | W4—O3—W1                 | 120.90(35) |
| O6—W5—O11   | 82.6(3)    | W4—O3—K2                 | 100.66(26) |
| O10—W5—Mn2  | 132.0(3)   | W1—O3—K2                 | 102.82(24) |
| O13—W5—Mn2  | 31.9(2)    | W1—O4—K1 <sup>viii</sup> | 179.95(50) |
| O12—W5—Mn2  | 88.3(2)    | W4—O5—W2                 | 150.12(43) |
| O9—W5—Mn2   | 83.1(3)    | W4—O5—K2                 | 106.23(28) |
| O6—W5—Mn2   | 127.4(2)   | W2—O5—K2                 | 102.02(27) |
| O11—W5—Mn2  | 44.80(1)   | W4—O6—W5                 | 149.09(40) |
| O21—Mn1—O22 | 90.34(24)  | W4 <sup>I</sup> —O7—W4   | 119.65(1)  |
| O21—Mn1—O15 | 173.37(21) | W4—O8—K3 <sup>ix</sup>   | 160.20(41) |
| O22—Mn1—O15 | 89.45(31)  | W5 <sup>I</sup> —O9—W5   | 117.56(1)  |
| O21—Mn1—O18 | 92.28(20)  | W5—O10—K3 <sup>ii</sup>  | 122.55(35) |
| O22—Mn1—O18 | 170.55(30) | Si1—O11—Mn2              | 121.30(51) |
| O15—Mn1—O18 | 86.89(28)  | Si1—O11—W5               | 127.24(1)  |
| O21—Mn1—O24 | 93.84(22)  | Mn2—O11—W5               | 89.11(1)   |
| O22—Mn1—O24 | 98.49(31)  | W5 <sup>I</sup> —O11—W5  | 91.31(1)   |
| O15—Mn1—O24 | 92.74(32)  | W5—O12—W2                | 153.22(40) |
| O18—Mn1—O24 | 90.39(30)  | W5—O13—Mn2               | 117.40(42) |
| O21—Mn1—O14 | 96.82(18)  | Si1—O14—Mn1              | 122.10(39) |
| O22—Mn1—O14 | 94.80(29)  | Si1—O14—W2               | 126.42(34) |
| O15—Mn1—O14 | 76.60(29)  | Mn1—O14—W2               | 89.52(26)  |
| O18—Mn1—O14 | 75.88(28)  | Si1—O14—W3               | 126.58(37) |
| O24—Mn1—O14 | 162.89(31) | Mn1—O14—W3               | 89.05(24)  |
| O21—Mn1—W2  | 142.31(6)  | W2—O14—W3                | 92.04(24)  |
| O22—Mn1—W2  | 91.46(24)  | W2—O15—Mn1               | 116.32(38) |
| O15—Mn1—W2  | 31.08(21)  | W2—O16—K1 <sup>ii</sup>  | 167.50(34) |
| O18—Mn1—W2  | 80.93(22)  | W2—O17—W3                | 118.81(35) |



|                           |            |                                        |            |
|---------------------------|------------|----------------------------------------|------------|
| O24—Mn1—W2                | 123.02(25) | W2—O17—K2                              | 106.01(28) |
| O14—Mn1—W2                | 45.52(20)  | W3—O17—K2                              | 107.96(30) |
| O13 <sup>1</sup> —Mn2—O13 | 88.79(33)  | W3—O18—Mn1                             | 118.80(36) |
| O13—Mn2—O22               | 89.90(33)  | W3—O18—K3                              | 131.09(37) |
| O13—Mn2—O22 <sup>1</sup>  | 172.65(33) | Mn1—O18—K3                             | 107.63(30) |
| O22—Mn2—O22 <sup>1</sup>  | 90.47(32)  | W3 <sup>1</sup> —O19—W3                | 154.69(1)  |
| O13—Mn2—O23               | 96.16(22)  | W3—O20—K3 <sup>vii</sup>               | 153.94(37) |
| O22—Mn2—O23               | 91.17(21)  | Mn1 <sup>1</sup> —O21—Mn1              | 134.92(5)  |
| O13—Mn2—O11               | 76.84(23)  | Mn1—O21—K1                             | 93.55(4)   |
| O22—Mn2—O11               | 95.82(22)  | Mn1—O22—Mn2                            | 134.14(40) |
| O23—Mn2—O11               | 170.06(40) | Mn1—O22—K1                             | 101.43(27) |
| O13—Mn2—W5 <sup>1</sup>   | 82.04(24)  | Mn2—O22—K1                             | 89.24(28)  |
| O22—Mn2—W5 <sup>1</sup>   | 141.91(23) | Mn2—O23—K1                             | 94.45(44)  |
| O13—Mn2—W5                | 30.76(24)  | Mn1—O24—K3                             | 100.58(30) |
| O22—Mn2—W5                | 93.17(24)  | K3—O26—K3 <sup>vii</sup>               | 97.31(47)  |
| O23—Mn2—W5                | 126.60(1)  | Mn1 <sup>1</sup> —Mn1—Mn2 <sup>1</sup> | 60.42(3)   |
| O11—Mn2—W5                | 46.09(1)   | Mn1 <sup>1</sup> —Mn2—Mn1              | 59.16(3)   |
| W5 <sup>1</sup> —Mn2—W5   | 62.02(1)   |                                        |            |

Symmetry codes:

(i)  $x, 0.5-y, z$ ; (ii)  $1-x, -y, 1-z$ ; (iii)  $1-x, 0.5+y, 1-z$ ; (iv)  $-1+x, y, -1+z$ ; (v)  $2-x, -y, 2-z$ ; (vi)  $-1+x, y, z$ ; (vii)  $1-x, -y, 2-z$ ; (viii)  $1+x, y, 1+z$ ; (ix)  $1+x, y, z$ ; (x)  $1+x, 0.5-y, z$ ; (xi)  $1-x, -0.5+y, 1-z$ ; (xii)  $1-x, 0.5+y, 2-z$ ; (xiii)  $2-x, 0.5+y, 2-z$ ; (xiv)  $x, y, 1+z$ .

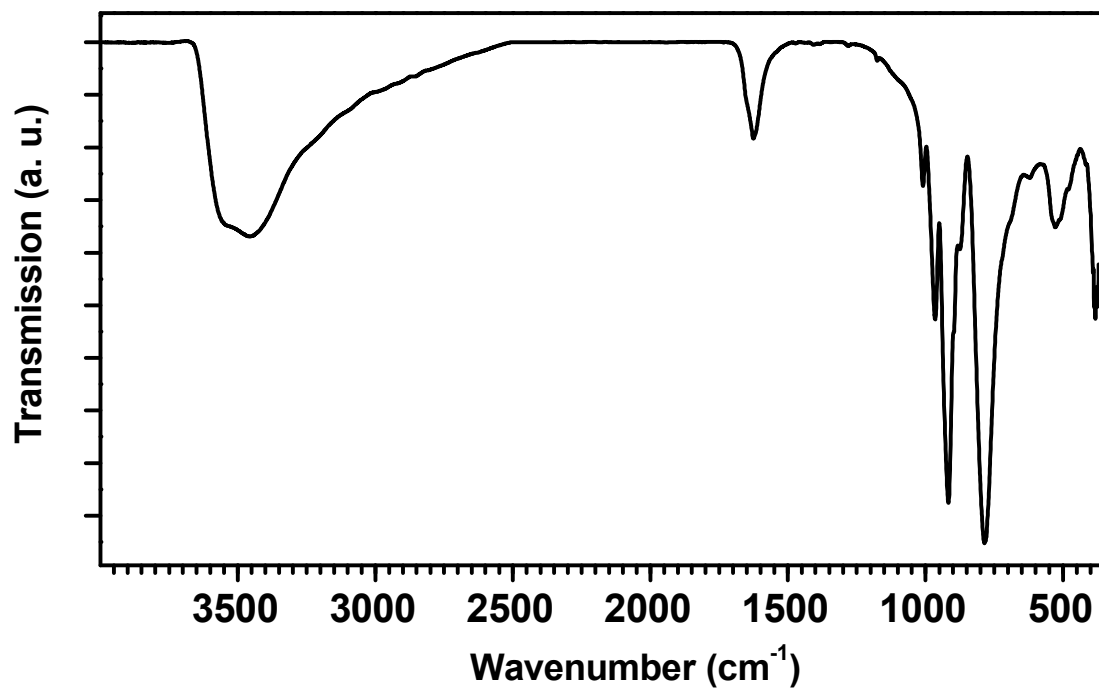

Figure S4. IR spectrum of 1.

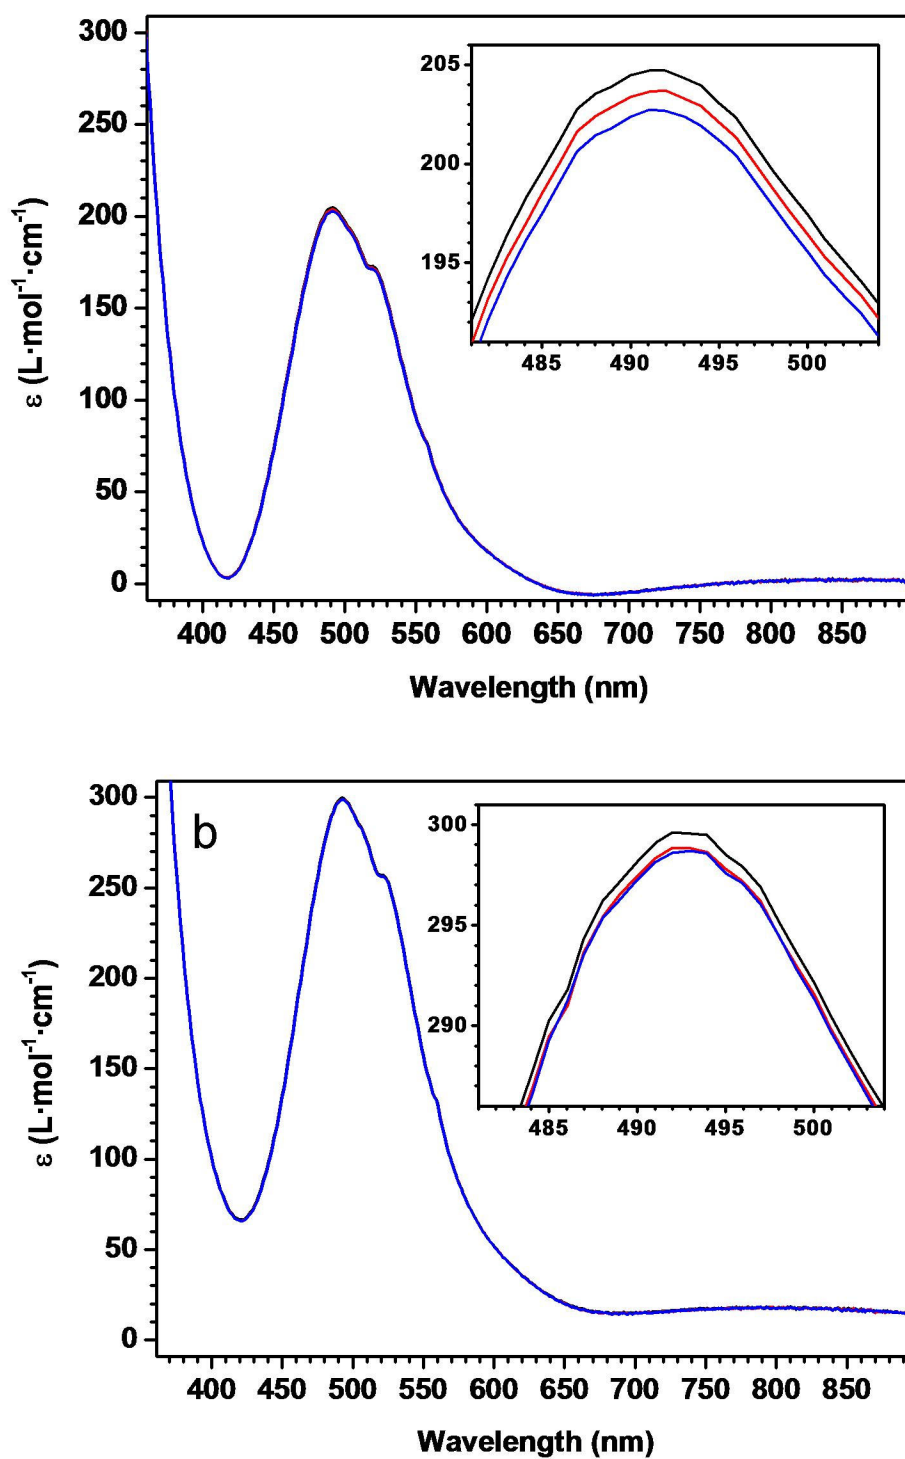

Figure S5. Stability of **1** in aqueous solution. A) UV-visible spectra of an 1 mM solution of **1** in 100 mM Lutidine.HClO<sub>4</sub> buffer (pH 7.0). B) UV-visible spectra of an 1 mM solution of **1** in H<sub>2</sub>O. The spectra were measured directly (black), 30 min (red), and 60 min (blue) after dissolution. Inset: a zoom-in of the molar extinction coefficient ( $\epsilon$ ) in the 480-505 nm range.

The solution was filtered before the measurement.

Table S3. Assignment of the groups of peaks in the ESI mass spectrum.

| experimental m/z | Species (calculated m/z)                                               |
|------------------|------------------------------------------------------------------------|
| 1294.9           | $[M]H_2 \cdot 5H_2O^{2-}$ (1295.15)                                    |
| 1313.9           | $[M]KH \cdot 5H_2O^{2-}$ (1314.12)                                     |
| 1350.7           | $[M]K_2 \cdot 7H_2O^{2-}$ (1350.61)                                    |
| 1367.5           | $[M]KH \cdot 11H_2O^{2-}$ (1367.66)                                    |
| 1386.5           | $[M]K_2 \cdot 11H_2O^{2-}$ (1386.63)                                   |
| 1405.7           | $[Mn^{III}_3(OH)_4(H_2O)_2SiW_9O_{34}]K_3 \cdot 11H_2O^{2-}$ (1405.61) |

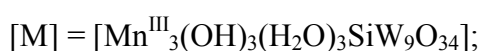

Table S4. Assignment of the groups of peaks in the MALDI TOF mass spectrum.

| experimental m/z | Species (calculated m/z)                   |                                                                                   |
|------------------|--------------------------------------------|-----------------------------------------------------------------------------------|
| 2683.5           | $\{[M]KH_2(H_2O)_8\}^-$ (2682.28)          | $\{[M]K_2H(H_2O)_6\}^-$ (2684.22)                                                 |
| 2702.6           | $\{[M]KH_2(H_2O)_9\}^-$ (2700.29)          | $\{[M]K_2H(H_2O)_7\}^-$ (2702.29)                                                 |
| 2721.4           | $\{[M]KH_2(H_2O)_{10}\}^-$ (2718.30)       | $\{[M]K_2H(H_2O)_8\}^-$ (2720.24)<br>$\{[M]K_3(H_2O)_6\}^-$ (2722.17)             |
| 2737.4           | $\{[M]KH_2(H_2O)_{11}\}^-$ (2736.31)       | $\{[M]K_2H(H_2O)_9\}^-$ (2738.25)                                                 |
| 2817.3           | $\{[M]KH_2(H_2O)_7(DHAP)\}^-$ (2816.32)    | $\{[M]K_2H(H_2O)_5(DHAP)\}^-$ (2818.25)                                           |
| 2835.3           | $\{[M]KH_2(H_2O)_8(DHAP)\}^-$ (2834.33)    | $\{[M]K_2H(H_2O)_6(DHAP)\}^-$ (2836.26)                                           |
| 2853.3           | $\{[M]KH_2(H_2O)_9(DHAP)\}^-$ (2852.34)    | $\{[M]K_2H(H_2O)_7(DHAP)\}^-$ (2854.27)                                           |
| 2872.1           | $\{[M]KH_2(H_2O)_{10}(DHAP)\}^-$ (2871.36) | $\{[M]K_2H(H_2O)_8(DHAP)\}^-$ (2873.29)                                           |
| 2890.1           | $\{[M]KH_2(H_2O)_{11}(DHAP)\}^-$ (2888.36) | $\{[M]K_2H(H_2O)_9(DHAP)\}^-$ (2890.29)<br>$\{[M]K_3(H_2O)_7(DHAP)\}^-$ (2892.23) |
| 2969.2           | $\{[Mn]KH_2(H_2O)_8(DHAP)_2\}^-$ (2968.36) | $\{[Mn]K_2H(H_2O)_6(DHAP)_2\}^-$ (2970.30)                                        |

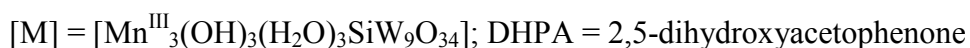

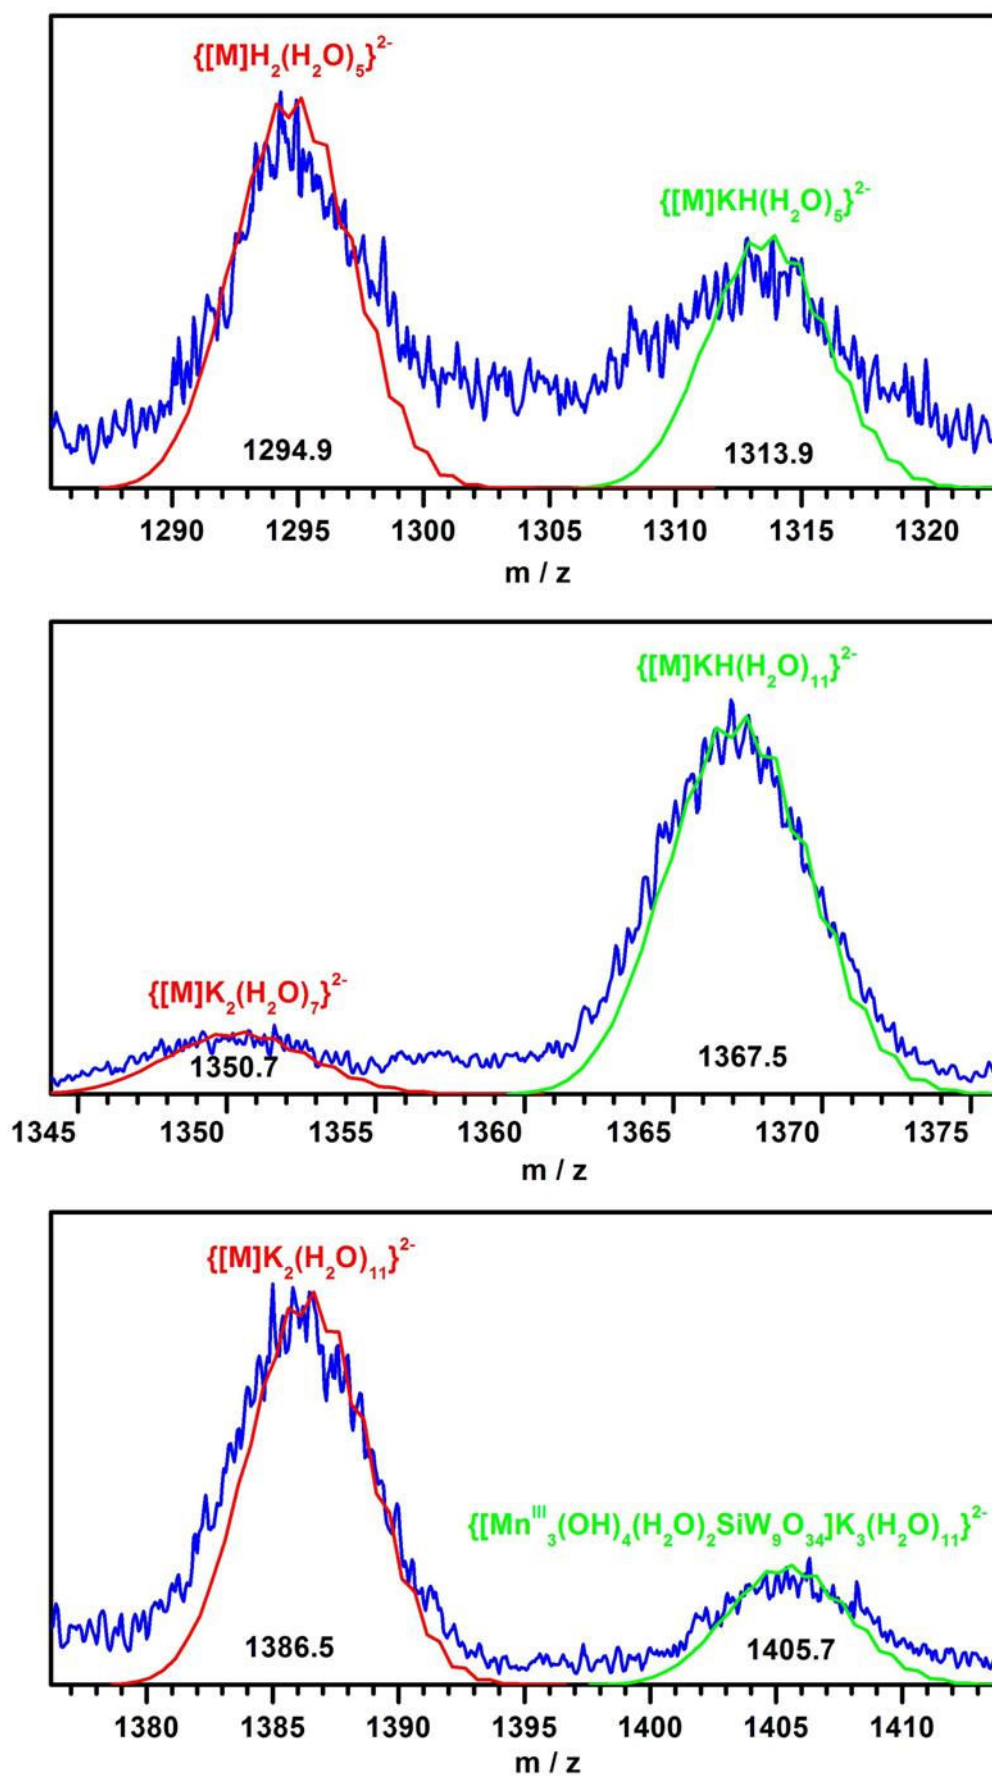

Fig. S6. Isotopic distributions for the species found in the ESI mass spectrum. The blue is the actual spectrum, the red and green lines show the predicted envelopes.  $[M] = [Mn^{III}_3(OH)_3(H_2O)_3SiW_9O_{34}]$ .

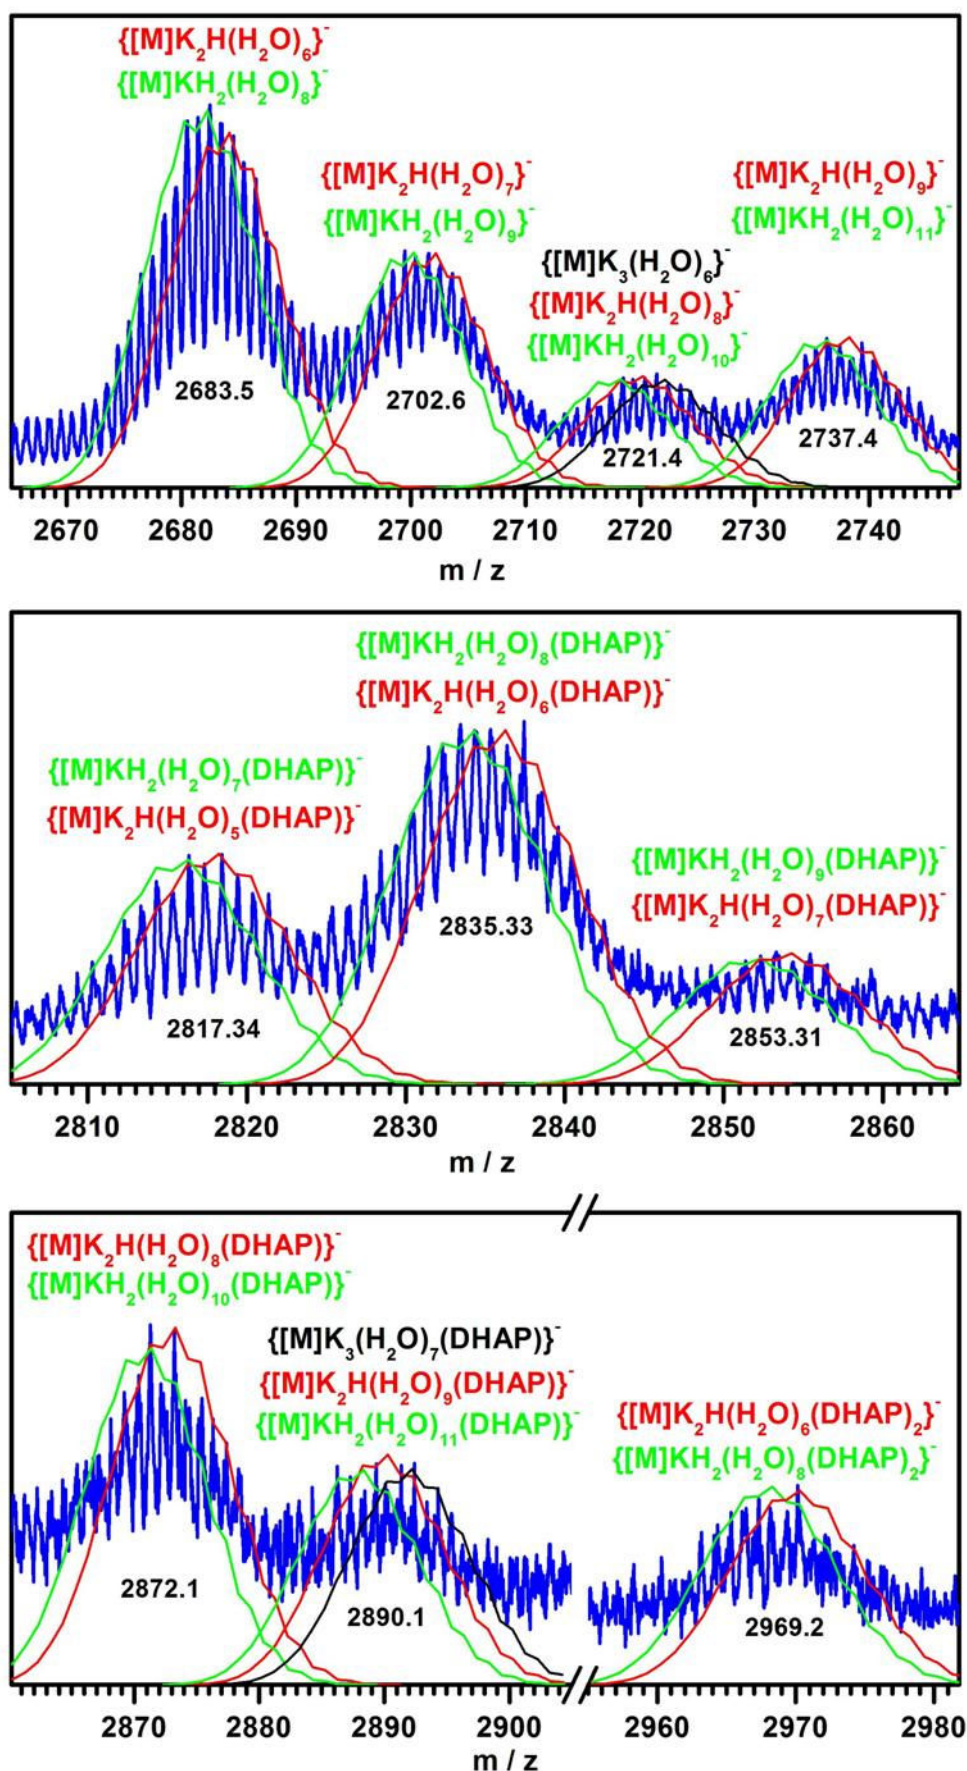

Fig. S7. Isotopic distributions for the species found in the MALDI TOF mass spectrum of **1**. The blue is the actual spectrum, the red, green and black lines show the predicted envelopes from single species.  $[M] = [Mn^{III}_3(OH)_3(H_2O)_3SiW_9O_{34}]$ ; DHAP = 2,5-dihydroxyacetophenone
